# Supplementary material
Source: publisher site journal article supplement (http://static.cambridge.org/content/id/urn:cambridge.org:id:article:S1355617719000420/resource/name/S1355617719000420supp001.docx)
Supplement: Supplementary file 1 [file S1355617719000420supp001.docx]

**Exploring Heterogeneity on the Wisconsin Card Sorting Test in Schizophrenia-Spectrum Disorders. A Cluster Analytical Investigation**

Sean P. Carruthers, Caroline T. Gurvich, Denny Meyer, Australian Schizophrenia Research Bank, Chad Bousman, Ian P. Everall, Erica Neill, Christos Pantelis, Philip J. Sumner, Eric J. Tan, Elizabeth H. X. Thomas, Tamsyn E. Van Rheenen, Susan L. Rossell

**Supplementary Material**

**Supplementary Table 1.** BPRS items with corresponding PANSS item.

| BPRS Item | Corresponding PANSS Item |
| --- | --- |
| **Affect** |  |
| Somatic Concern | G1. Somatic Concern |
| Anxiety | G2. Anxiety |
| Depression | G6. Depression |
| Guilt | G3. Guilty Feelings |
| **Positive** |  |
| Grandiosity | P5. Grandiosity |
| Hallucinations | P3. Hallucinatory Behaviour |
| Unusual Thought Content | G9. Unusual Thought Content |
| Conceptual Disorganisation | P2. Conceptual Disorganisation |
| **Negative** |  |
| Blunted Affect | N1. Blunted Affect |
| Emotional Withdrawal | N2. Emotional Withdrawal |
| Motor Retardation | G7. Motor Retardation |

**Supplementary Table 2.** Comparison of WCST z-scores across sex and group.

|  |  | Relatively Intact  (54/18) | Moderate Impairment  (91/23) | Severe Impairment (13/11) | Healthy Control (106/86) | Total | | Test Statistic | Sex x Group |
| --- | --- | --- | --- | --- | --- | --- | --- | --- | --- |
| Male  (n = 264) | Female  (n = 139) |
| WCST |  |  |  |  |  |  |  |  |  |
| TA | Male | 0.63 (1.1) | 2.09 (0.0) | 2.09 (0.0) | 0.07 (1.0) | 0.98 (1.2) | 0.55 (1.3) | *F*1,402 = 11.2, *p* ≤ .001 | *F*3,402 = 0.4, *p* = .75 |
|  | Female | 0.69 (1.0) | 2.09 (0.0) | 2.09 (0.0) | -0.11 (1.0) |  |  |  |  |
| CAT | Male | 0.06 (0.5) | -4.64 (1.4) | -7.49 (0.4) | 0.03 (0.9) | -1.95 (2.7) | -1.35 (2.7) | *F*1,402 = 4.3, *p* ≤ .05 | *F*3,402 = 0.2, *p* = .88 |
|  | Female | 0.16 (0.4) | -4.73 (1.3) | -7.2 (0.9) | 0.04 (0.9) |  |  |  |  |
| NPE | Male | 0.34 (0.9) | 2.33 (1.4) | 3.24 (2.0) | 0.04 (1.0) | 1.05 (1.6) | 0.68 (1.6) | *F*1,402 = 4.9, *p* ≤ .05 | *F*3,402 = 0.9, *p* = .43 |
|  | Female | 0.41 (0.8) | 2.6 (1.4) | 2.80 (1.4) | -0.09 (0.9) |  |  |  |  |
| PE | Male | 0.18 (0.6) | 2.51 (1.7) | 3.90 (2.0) | -0.01 (1.0) | 1.09 (1.8) | 0.84 (1.8) | *F*1,402 = 1.7, *p* = .19 | *F*3,402 = 0.4, *p* = .73 |
|  | Female | 0.26 (0.6) | 2.84 (1.3) | 4.24 (1.8) | -0.02 (1.0) |  |  |  |  |
| TFC | Male | 0.06 (0.7) | 1.26 (2.0) | 12.12 (1.4) | 0.05 (1.1) | 1.06 (3.0) | 1.26 (3.5) | *F*1,402 = 0.3, *p* = .56 | *F*3,402 = 2.3, *p* = .07 |
|  | Female | -0.05 (0.5) | 2.05 (2.6) | 12.16 (1.1) | -0.14 (0.5) |  |  |  |  |
|  |  |  |  |  |  |  |  |  |  |
| TC# | Male | 1.15 (1.7) | 0.22 (2.1) | -3.16 (2.5) | 0.14 (1.1) | 0.06 (1.9) | -0.39 (1.5) | *F*1,339.0 = 6.4, *p* ≤ .05* | *F*3,402 = 0.8, *p* = .52 |
|  | Female | 1.10 (1.6) | -1.0 (1.4) | -3.17 (2.0) | -0.17 (0.8) |  |  |  |  |
| FMS# | Male | 1.00 (1.9) | 2.68 (3.0) | 2.41 (4.1) | 0.01 (1.0) | 1.25 (2.5) | 0.40 (1.7) | *F*1,382.9 = 16.8, *p* ≤ .001* | *F*3,402 = 2.2, *p* = .09 |
|  | Female | 0.63 (1.8) | 1.21 (2.0) | 1.59 (3.2) | -0.08 (0.8) |  |  |  |  |

Data is reported as mean (SD) unless otherwise stated; (Male/Female); WCST, Wisconsin Card Sorting Test; TA, trials administered; CAT, categories achieved; NPE, non-perseverative errors; PE, perseverative errors; TFC, trials to first category;

TC, total correct; FMS, failure to maintain set; # not included in cluster analysis; * Brown-Forythe F-ratio reported Bold indicates large effect sizes

**Supplementary Table 3.** Comparison of WCST z-scores across schizophrenia-spectrum diagnosis and subgroup.

|  |  | Relatively Intact  (50/22) | Moderate Impairment  (102/12) | Severe Impairment (20/4) | Total | | Test Statistic | Schizophrenia-Spectrum Diagnosis x Group |
| --- | --- | --- | --- | --- | --- | --- | --- | --- |
| Schizophrenia  (n = 172) | Schizoaffective Disorder  (n = 38) |
| WCST |  |  |  |  |  |  |  |  |
| TA | Sz | 0.73 (1.1) | 2.09 (0.0) | 2.09 (0.0) | 1.69 (0.9) | 1.14 (1.1) | *F*1,47.3 = 8.6, *p* ≤ .001* | *F*2,210 = 0.8, *p* = .47 |
|  | SzA | 0.45 (1.0) | 2.09 (0.0) | 2.09 (0.0) |  |  |  |  |
| CAT | Sz | 0.04 (0.5) | -4.65 (1.3) | -7.39 (0.6) | -3.61 (2.7) | -2.16 (3.0) | *F*1,209 = 8.5, *p* ≤ .01 | *F*2,210 = 0.2, *p* = .85 |
|  | SzA | 0.18 (0.4) | -4.74 (1.4) | -7.26 (0.7) |  |  |  |  |
| NPE | Sz | 0.32 (0.9) | 2.34 (1.3) | 3.24 (1.7) | 1.86 (1.6) | 1.35 (1.6) | *F*1,209 = 3.1, *p* = .82 | *F*2,210 = 2.2, *p* = .12 |
|  | SzA | 0.44 (0.7) | 2.80 (1.7) | 2.04 (1.5) |  |  |  |  |
| PE | Sz | 0.27 (0.7) | 2.59 (1.7) | 4.08 (1.9) | 2.09 (1.9) | 1.2 (1.8) | *F*1,209 = 6.4, *p* ≤ .01 | *F*2,210 = 0.2, *p* = .99 |
|  | SzA | 0.05 (0.6) | 2.47 (1.2) | 3.91 (2.1) |  |  |  |  |
| TFC | Sz | 0.03 (0.7) | 1.29 (2.1) | 12.07 (1.4) | 2.18 (4.0) | 2.12 (4.1) | *F*1,209 = 0.01 *p* = .94 | *F*2,210 = 1.7, *p* = .18 |
|  | SzA | 0.03 (0.6) | 2.53 (2.8) | 12.42 (0.2) |  |  |  |  |
|  |  |  |  |  |  |  |  |  |
| TC# | Sz | 1.33 (1.7) | -0.34 (2.0) | -3.42 (2.2) | -0.21 (2.4) | -0.01 (1.9) | *F*1,209 = 0.3 *p* = .62 | *F*2,210 = 1.8, *p* = .18 |
|  | SzA | 0.69 (1.4) | -0.66 (2.0) | -1.89 (2.1) |  |  |  |  |
| FMS# | Sz | 1.15 (2.1) | 2.55 (2.9) | 1.87 (3.8) | 2.06 (2.9) | 0.82 (1.9) | *F*1,80.7 = 11.1, *p* ≤ .001* | *F*2,210 = 1.2, *p* = .30 |
|  | SzA | 0.36 (1.1) | 0.97 (2.0) | 2.88 (3.6) |  |  |  |  |

Data is reported as mean (SD) unless otherwise stated; (schizophrenia/schizoaffective disorder); WCST, Wisconsin Card Sorting Test; TA, trials administered; CAT, categories achieved; NPE, non-perseverative errors; PE, perseverative errors;

TFC, trials to first category; TC, total correct; FMS, failure to maintain set; Sz, schizophrenia; SzA, schizoaffective disorder; # not included in cluster analysis; * Brown-Forythe F-ratio reported Bold indicates large effect sizes

|  | Relatively Intact  (n=72) | | Moderate Impairment  (n=114) | | Severe Impairment  (n=24) | | Healthy Control  (n=192) | |
| --- | --- | --- | --- | --- | --- | --- | --- | --- |
| Categories Achieved | Count | % | Count | % | Count | % | Count | % |
| 0 | - | - | - | - | 21 | 87.5 | - | - |
| 1 | - | - | 34 | 29.8 | 2 | 8.3 | - | - |
| 2 | - | - | 34 | 29.8 | 1 | 4.2 | 1 | 0.5 |
| 3 | - | - | 32 | 28.1 | - | - | 5 | 2.6 |
| 4 | - | - | 14 | 12.3 | - | - | 7 | 3.6 |
| 5 | 12 | 16.7 | - | - | - | - | 6 | 3.1 |
| 6 | 60 | 83.3 | - | - | - | - | 173 | 90.1 |

**Supplementary Table 4.** Frequency of categories achieved across subgroups.


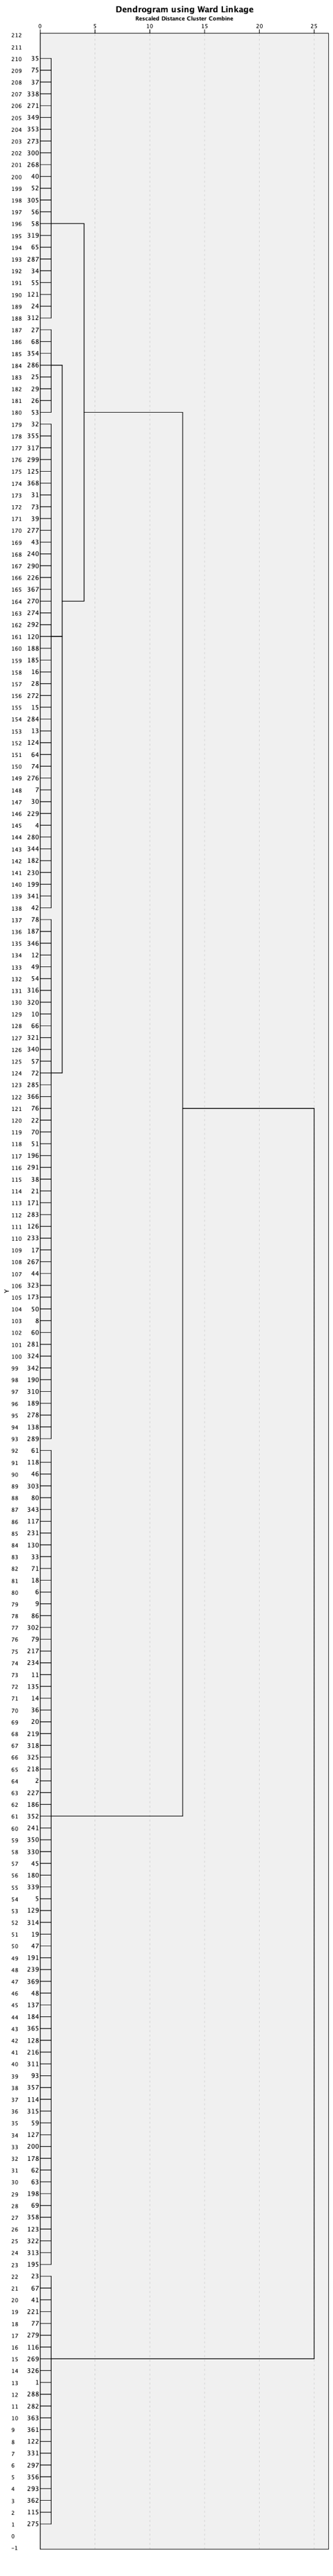
**Figure S1.** Agglomeration schedule


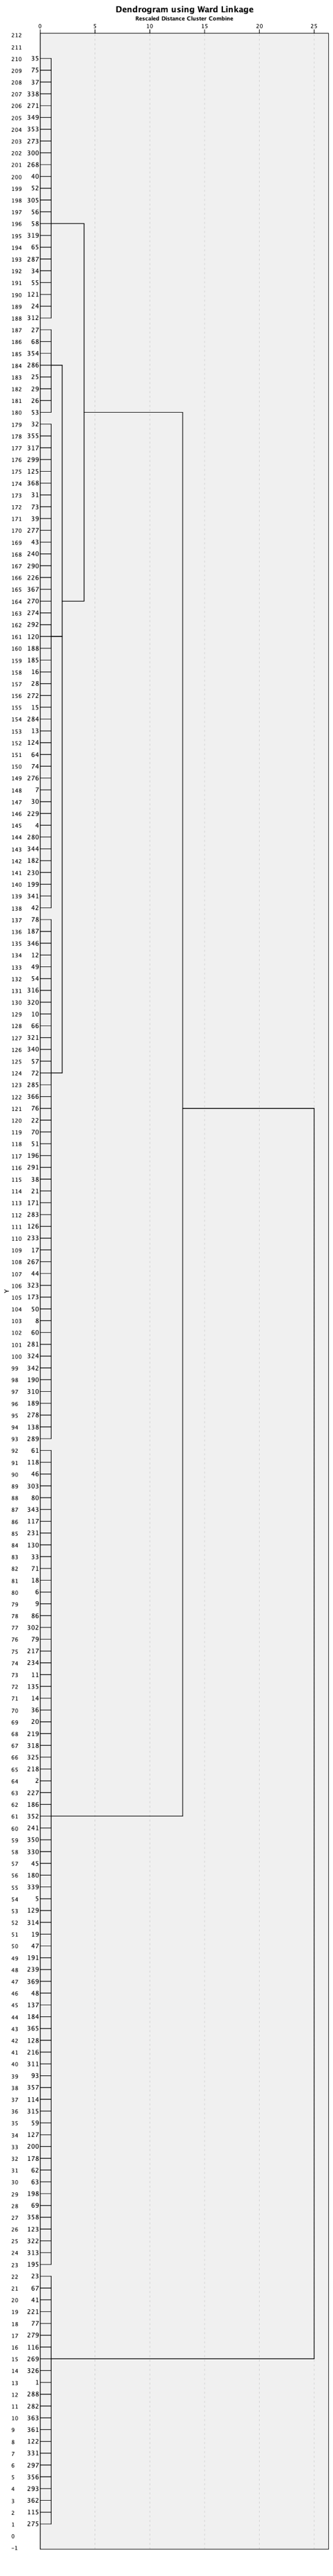
**Figure S2.** Dendrogram of cluster solution.
